# Supplementary material
Source: Springer Nature journal article supplement (https://www.springermedizin.de/resource/supplementary/12889_2013_6011_MOESM2_ESM.pdf/9494138)

a)

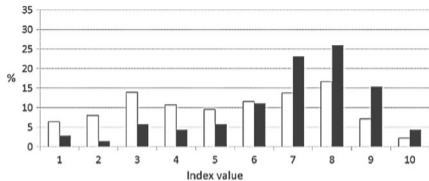

b)

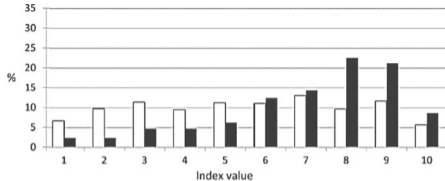

■ Cases □ Controls

c)

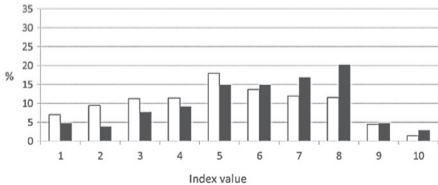

d)

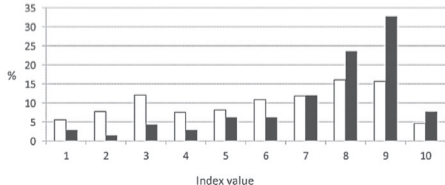

Supplement: MOESM2 [file 9494138]
